# Supplementary material
Source: PubMed Central journal article supplement (PMC2585821)
Supplement: NIHMS76082-supplement-01.pdf [file NIHMS76082-supplement-01.pdf]

43  
44 **Supplementary Information**

45  
46 **Supplementary Figure S1** Scanning electron micrograph of self-assembled HBPA  
47 nanofiber bundles upon the surface of a PLLA microfiber. Heparin is complexed directly  
48 to the HBPA nanofibers, which have diameters on the order of 7 nm. (scale bar represents  
49 100 nm).  
50

51  
52 **Supplementary Figure S2** CD31 staining of (a) **HBPA-CNTRL** and (b) **HBPA-GF**  
53 scaffolds retrieved from the duodenal muscularis on post-transplant day 14. Biological  
54 responses to HBPA-derived growth factors in the muscularis and epididymal fat pad (not  
55 shown) were similar to those observed in the omentum. Scaffolds were implanted in the  
56 muscularis via ~0.5 cm long incisions in the serosa (scale bars represent 25  $\mu$ m).  
57  
58  
59  
60

1  
2  
3 **Supplementary Figure S3** Sample blood glucose profile of an **HBPA-GF** specimen that  
4 achieved sustained normoglycemia within the first day post-transplant. Prior to  
5 transplantation, blood glucose levels were >300 mg/dL due to streptozotocin-induced  
6 diabetes. After receiving 250 islets in the presence of the **HBPA-GF** scaffold, blood  
7 glucose levels quickly dropped below 200 mg/dL and remained there for the remainder of  
8 the 100 day observation period.  
9  
10  
11  
12  
13  
14  
15  
16  
17  
18  
19  
20  
21  
22  
23  
24  
25  
26  
27  
28  
29  
30  
31  
32  
33  
34  
35  
36  
37  
38  
39  
40  
41  
42  
43  
44  
45  
46  
47  
48  
49  
50  
51  
52  
53  
54  
55  
56  
57  
58  
59  
60

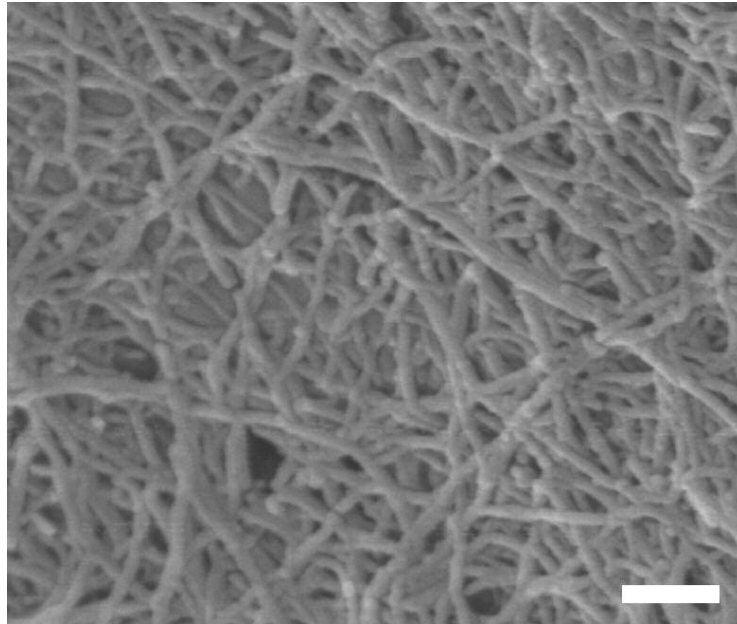

**Supplementary Figure S1** Scanning electron micrograph of self-assembled HBPA nanofiber bundles upon the surface of a PLLA microfiber. Heparin is complexed directly to the HBPA nanofibers, which have diameters on the order of 7 nm (scale bar represents 100 nm).

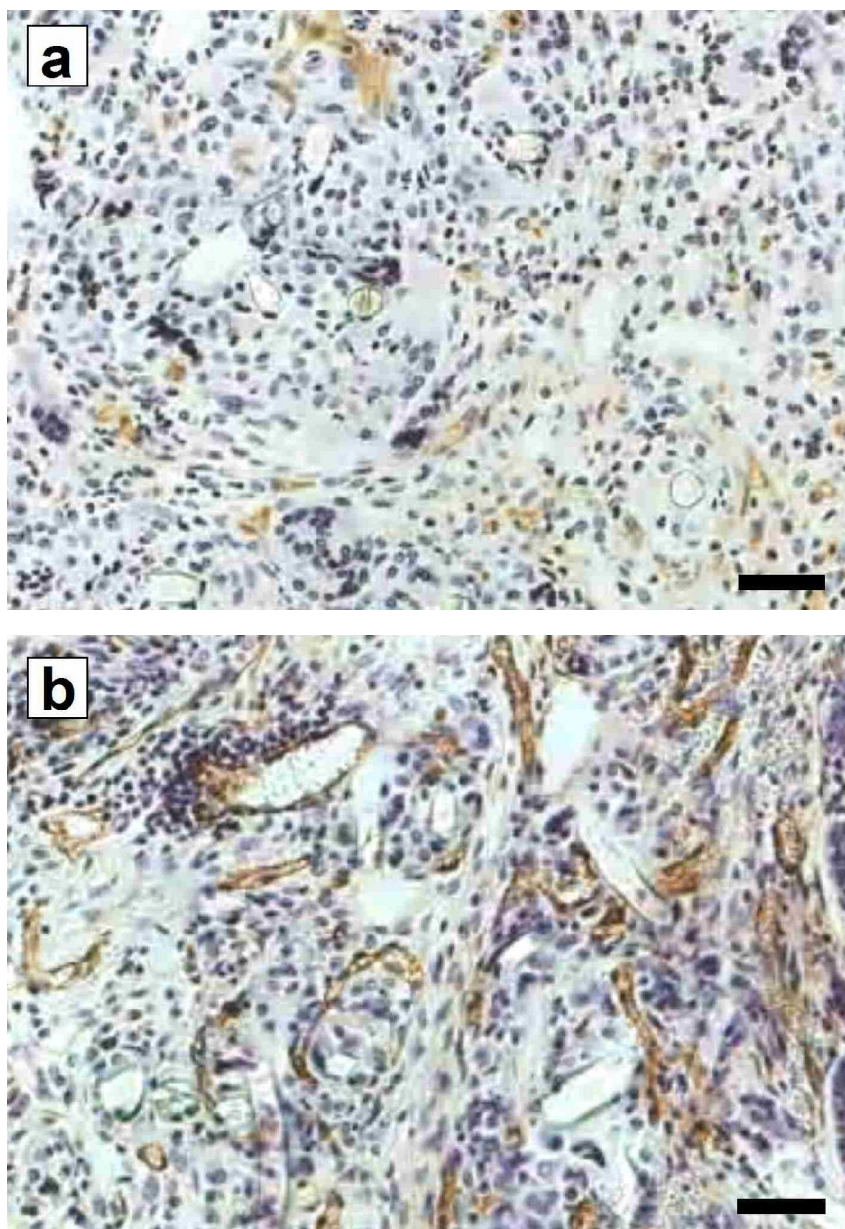

**Supplementary Figure S2** CD31 staining of (a) HBPA-CNTRL and (b) HBPA-GF scaffolds retrieved from the duodenal muscularis on post-transplant day 14. Biological responses to HBPA-derived growth factors in the muscularis and epididymal fat pad (not shown) were similar to those observed in the omentum. Scaffolds were implanted in the muscularis via ~0.5 cm long incisions in the serosa (scale bars represent 25  $\mu$ m).

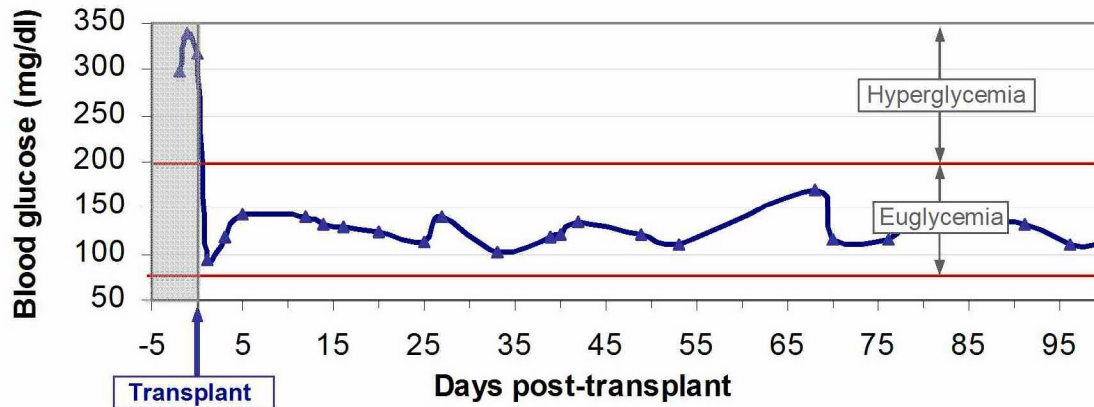

**Supplementary Figure S3** Sample blood glucose profile of an **HBPA-GF** specimen that achieved sustained euglycemia within the first day post-transplant. Prior to transplantation, blood glucose levels were >300 mg/dL due to streptozotocin-induced diabetes. After receiving 250 islets in the presence of the **HBPA-GF** scaffold, blood glucose levels quickly dropped below 200 mg/dL and remained there for the remainder of the 100 day observation period.
